# Supplementary material for: Noggin depletion in adipocytes promotes obesity in mice
Source: PubMed Central journal article supplement — Mol Metab. 2019 Apr 10;25:50–63. doi: 10.1016/j.molmet.2019.04.004 (PMC6600080; doi:10.1016/j.molmet.2019.04.004), 2019-04-10
Supplement: mmc1.pdf [file mmc1.pdf]

SUPPLEMENTAL FIGURES

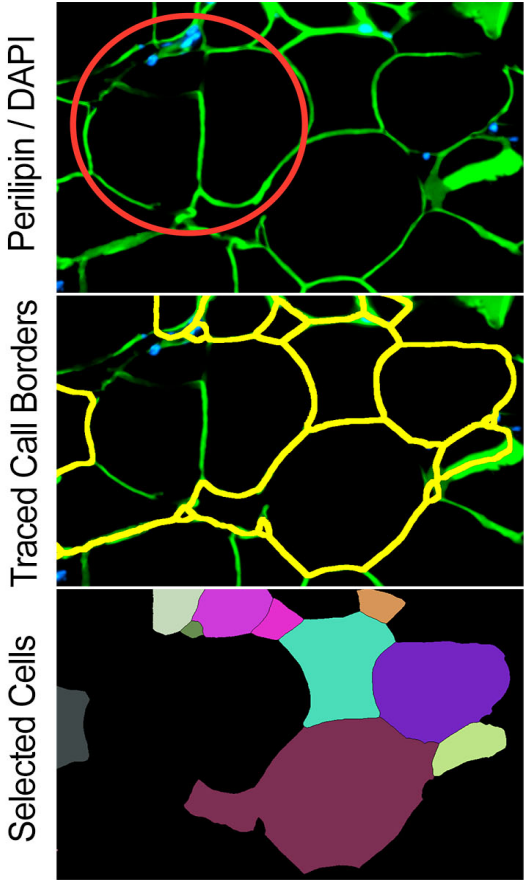

Supplemental Figure 1

Tracing of cell borders and selection of cells in adipose tissue stained with anti-Perilipin antibodies and DAPI.

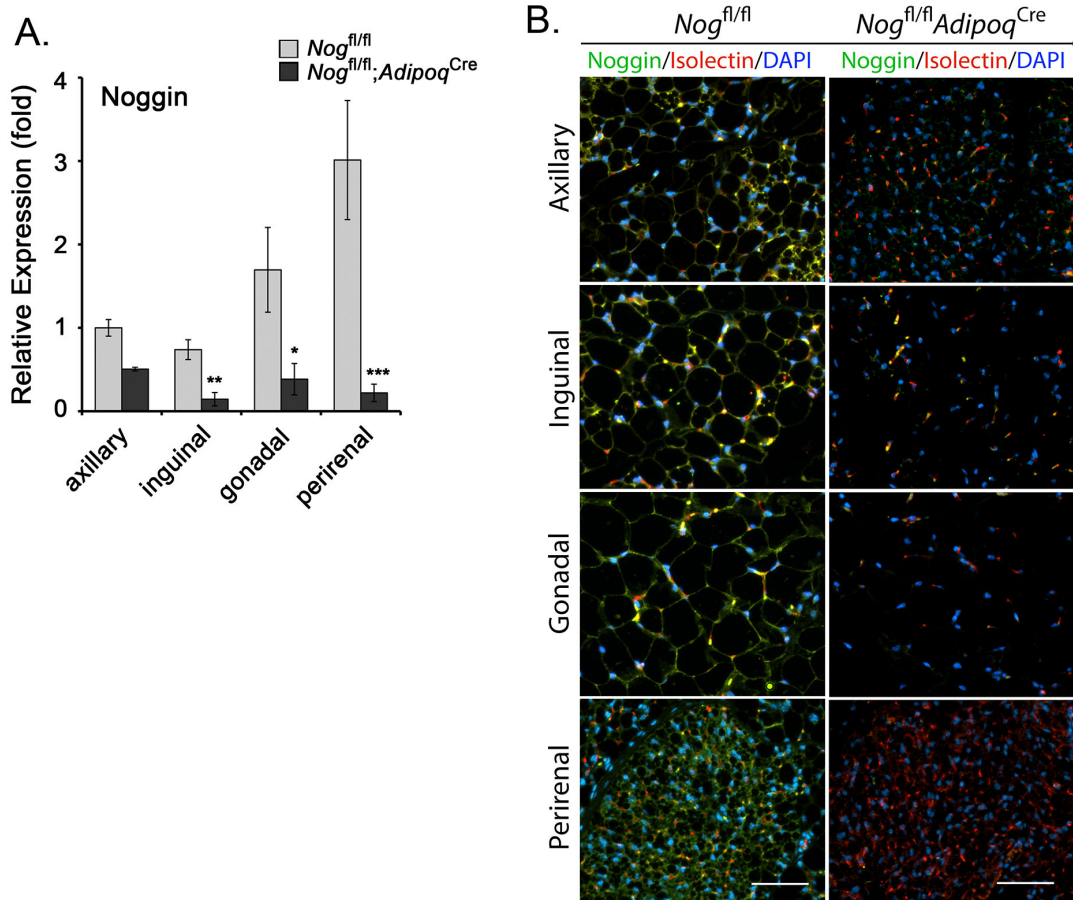

Supplemental Figure 2

**(A)** *Noggin* expression after adipocyte-specific *Noggin* deletion using the *Adipoq*-Cre promoter. *Noggin* expression in various fat depots was compared to the axillary depot, as determined by qPCR. \* $<0.05$ , \*\* $<0.01$ , \*\*\* $<0.001$

**(B)** Immunofluorescence for *Noggin* (green) in subcutaneous WAT; co-stained with Isolectin B4 as a marker of endothelial cells (red). DAPI (blue) was used to visualize nuclei (bars, 100  $\mu$ m).

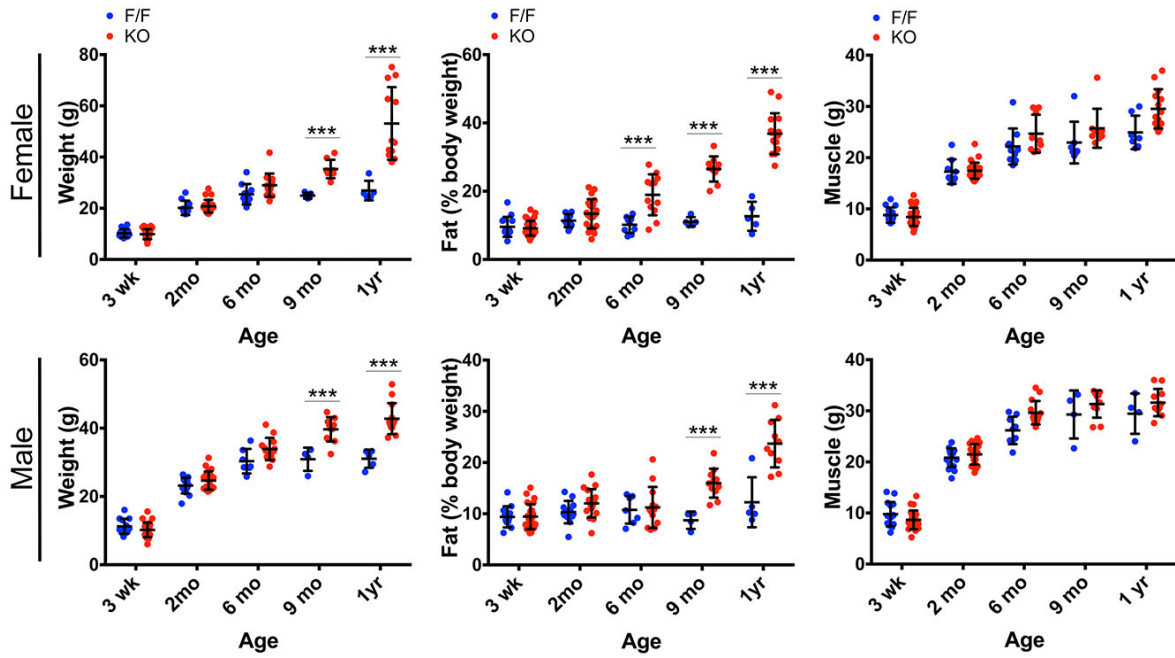

Supplemental Figure 3

*Time Course; Adipocyte-specific deletion of Noggin in mice promotes obesity.* Female and male mice with adipocyte-specific deletion of Noggin ( $Nog^{fl/fl}; Adipoq^{Cre}$  or KO) and control mice ( $Nog^{fl/fl}$  or F/F) were analyzed between ages 3 weeks and one year in regards to body weight and % fat and muscle.

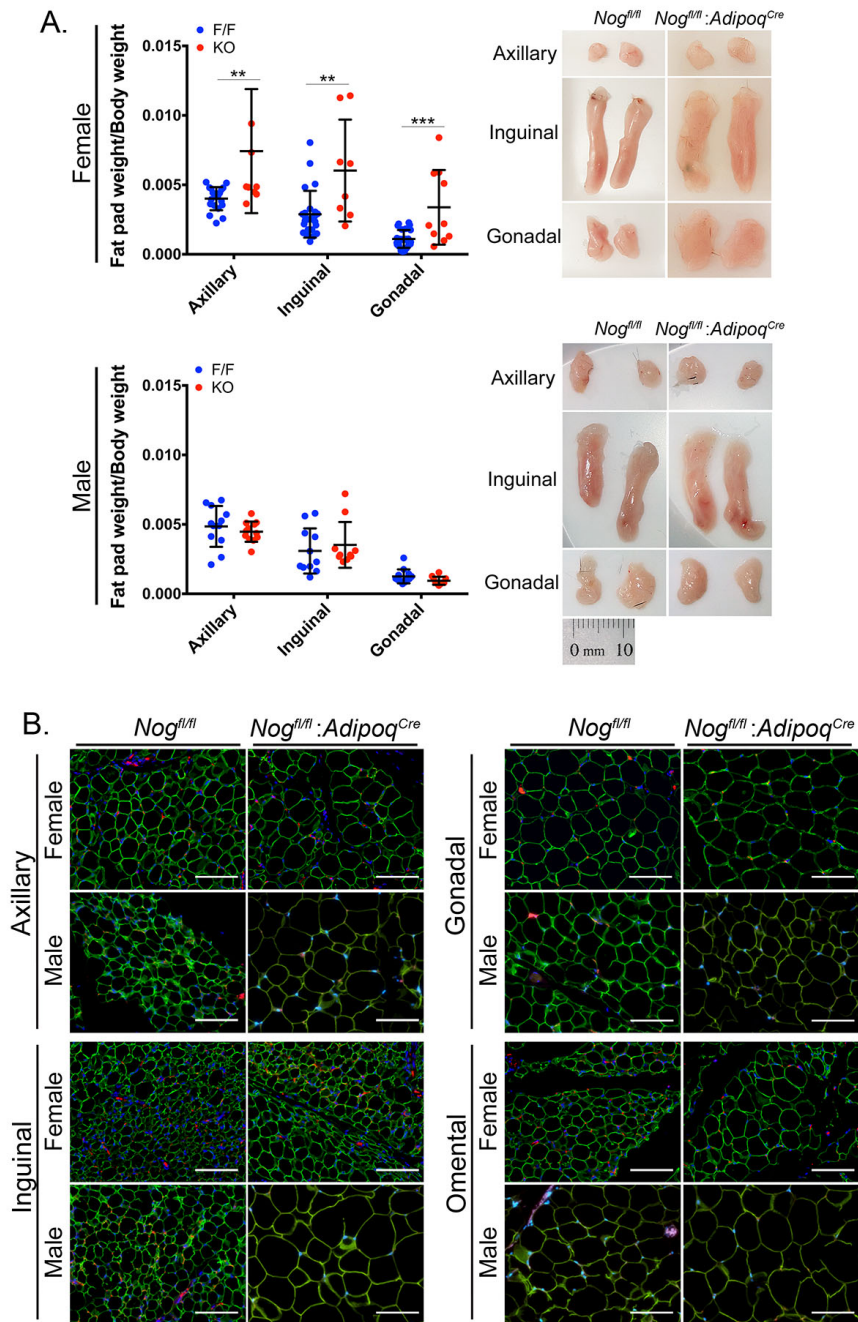

Supplemental Figure 4

**(A)** Adipocyte-specific deletion of Noggin in mice promotes obesity; fat pads at two months of age. Female and male mice with adipocyte-specific deletion of Noggin ( $Nog^{fl/fl};Adipoq^{Cre}$  or KO) and control mice ( $Nog^{fl/fl}$  or F/F) were analyzed at 2 months in regards to fat pad size from the axillary, inguinal and gonadal locations.

**(B)** Adipocyte-specific deletion of Noggin in mice at 2 months of age. Female and male mice with adipocyte-specific deletion of Noggin ( $Nog^{fl/fl};Adipoq^{Cre}$  or KO) and control mice ( $Nog^{fl/fl}$  or F/F) aged 2 months were analyzed by immunofluorescence for Perilipin (green). Sections were co-stained for CD31 (red) and DAPI (blue) was used to visualize nuclei (bars, 100  $\mu$ m).

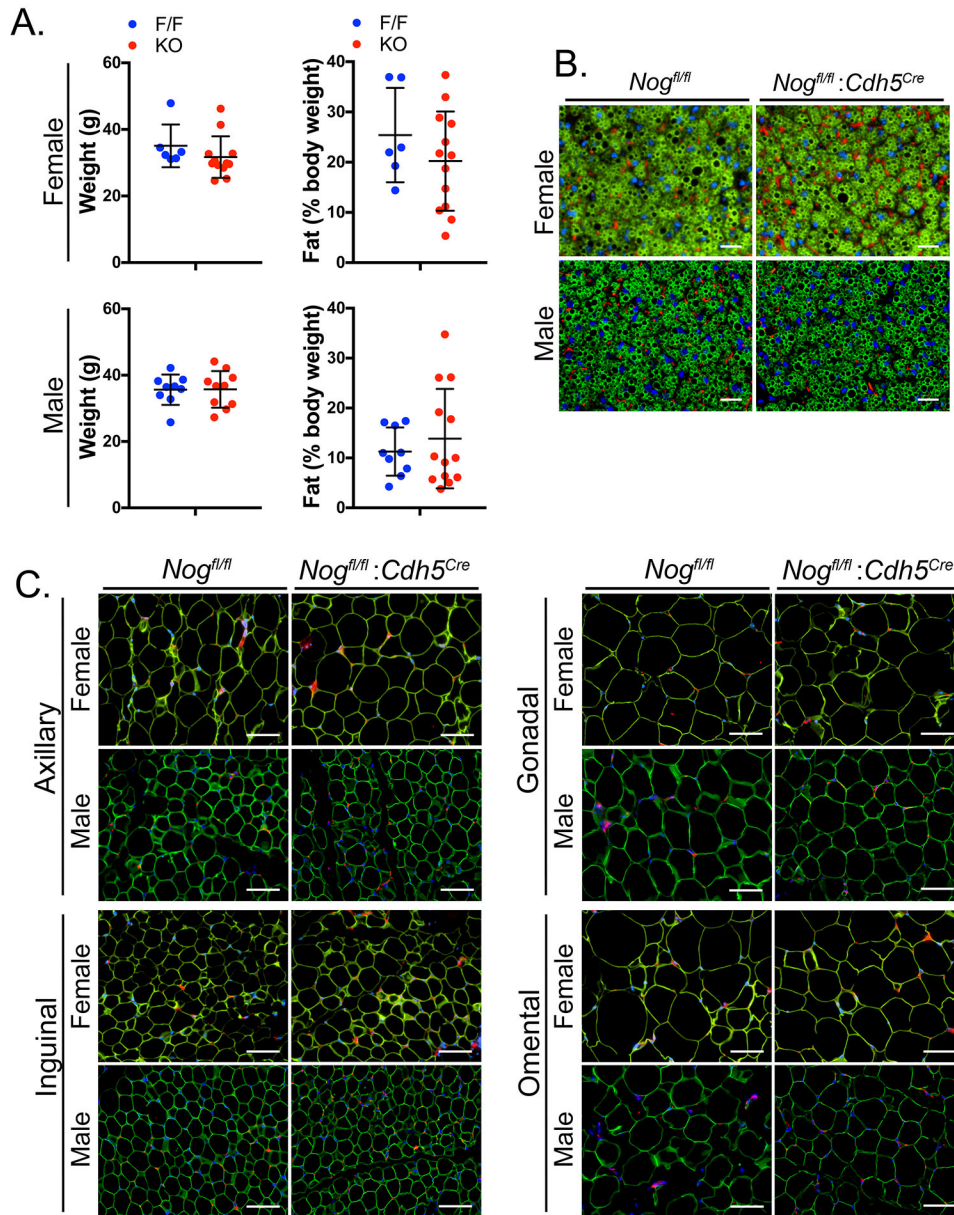

Supplemental Figure 5

**(A,B)** Endothelial cell (EC)-specific deletion of *Noggin* in mice does not cause obesity. Female and male mice with EC-specific deletion of *Noggin* (*Nog<sup>fl/fl</sup>;Cdh5<sup>Cre</sup>* or KO) and control mice (*Nog<sup>fl/fl</sup>* or F/F) aged one year were analyzed in regards to (A) body weight and percent fat, and by (B) immunofluorescence for Perilipin (green). Sections were co-stained for CD31 (red) and DAPI (blue) was used to visualize nuclei (bars, 100  $\mu$ m).

**(C)** Endothelial cell (EC)-specific deletion of *Noggin* in mice does not enlarge adipocytes. Female and male mice with EC-specific deletion of *Noggin* (*Nog<sup>fl/fl</sup>;Cdh5<sup>Cre</sup>* or KO) and control mice (*Nog<sup>fl/fl</sup>* or F/F) aged one year were analyzed by immunofluorescence for Perilipin (green). Sections were co-stained for CD31 (red) and DAPI (blue) was used to visualize nuclei (bars, 100  $\mu$ m).

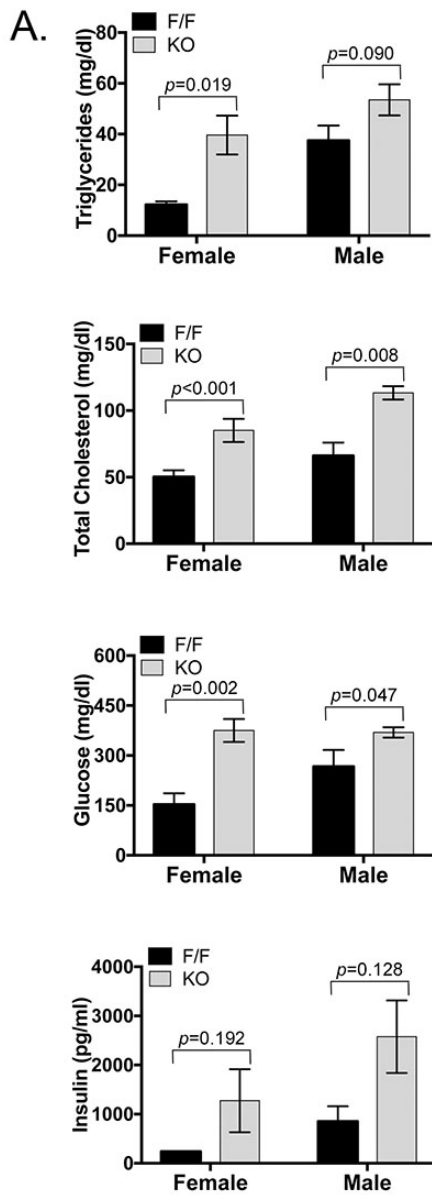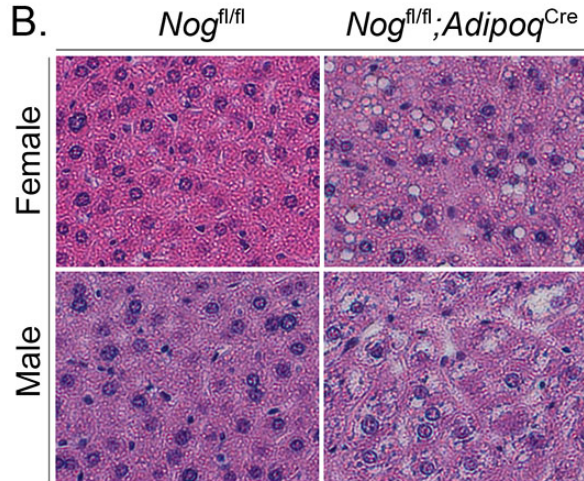

*Supplemental Figure 6*

**(A)** *Plasma levels of lipids, glucose and insulin.* Random plasma levels of triglycerides, total cholesterol, glucose and insulin in female and male mice with adipocyte-specific deletion of Noggin (KO) and control mice (F/F) aged one year. The values are presented as mean  $\pm$  SEM; p-values are adjusted for multiple comparisons.

**(B)** *Fatty liver in mice with Noggin deficiency.* Sections from the livers from female and male mice with adipocyte-specific deletion of Noggin (*Nog<sup>fl/fl</sup>;Adipoq<sup>Cre</sup>*) and control mice (*Nog<sup>fl/fl</sup>*) aged one year were analyzed by H&E staining.

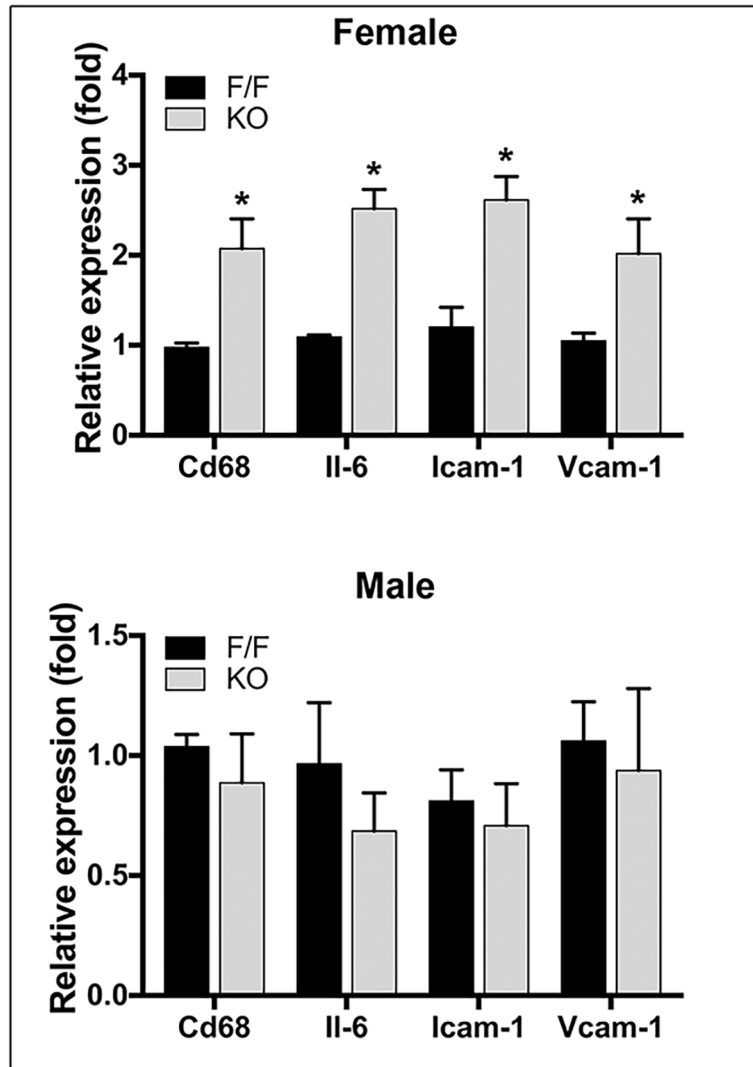

Supplemental Figure 7

Brown adipose tissues were collected from female and male mice with adipocyte-specific deletion of Noggin ( $Nog^{fl/fl}; Adipoq^{Cre}$  or KO) and control mice ( $Nog^{fl/fl}$  or F/F) aged 2 months.

Gene expression was determined by qPCR for CD68, IL-6, ICAM-1 and VCAM-1.  $n=3$ ;  $* < 0.05$ ,
